# Supplementary material for: Transfer and Decontamination of S. aureus in Transmission Routes Regarding Hands and Contact Surfaces
Source: PubMed Central journal article supplement (PMC4900614; doi:10.1371/journal.pone.0156390), 2016-06-09
Supplement: pone.0156390.s001.pdf [file pone.0156390.s001.pdf]

Table 1 Raw data for calculated transfer rate of *S. aureus*

| From contaminated | To material     | Experimen Blotting nc log CFU/su |    | Experimen Blotting nc log CFU/su |   |    |      |
|-------------------|-----------------|----------------------------------|----|----------------------------------|---|----|------|
| VITRO SKIN        | Plastic apron   | 1                                | 1  | 5,84                             | 2 | 1  | 6,01 |
| VITRO SKIN        | Plastic apron   | 1                                | 3  | 5,63                             | 2 | 3  | 5,57 |
| VITRO SKIN        | Plastic apron   | 1                                | 6  | 5,37                             | 2 | 6  | 4,78 |
| VITRO SKIN        | Plastic apron   | 1                                | 9  | 4,82                             | 2 | 9  | 4,32 |
| VITRO SKIN        | Plastic apron   | 1                                | 12 | 4,06                             | 2 | 12 | 3,89 |
| VITRO SKIN        | Plastic apron   | 1                                | 15 | 3,73                             | 2 | 15 | 3,00 |
| VITRO SKIN        | Plastic apron   | 1                                | 18 | 3,24                             | 2 | 18 | 2,45 |
| VITRO SKIN        | Plastic apron   | 1                                | 21 | 2,97                             | 2 | 21 | 2,16 |
| VITRO SKIN        | Cardboard       | 1                                | 1  | 6,23                             | 2 | 1  | 6,28 |
| VITRO SKIN        | Cardboard       | 1                                | 3  | 5,80                             | 2 | 3  | 6,09 |
| VITRO SKIN        | Cardboard       | 1                                | 6  | 4,88                             | 2 | 6  | 5,37 |
| VITRO SKIN        | Cardboard       | 1                                | 9  | 4,47                             | 2 | 9  | 4,65 |
| VITRO SKIN        | Cardboard       | 1                                | 12 | 3,32                             | 2 | 12 | 4,02 |
| VITRO SKIN        | Cardboard       | 1                                | 15 | 3,19                             | 2 | 15 | 3,40 |
| VITRO SKIN        | Cardboard       | 1                                | 18 | 3,22                             | 2 | 18 | 3,19 |
| VITRO SKIN        | Cardboard       | 1                                | 21 | 2,75                             | 2 | 21 | NA   |
| VITRO SKIN        | Stainless Steel | 1                                | 1  | 6,32                             | 2 | 1  | 6,37 |
| VITRO SKIN        | Stainless Steel | 1                                | 3  | 5,84                             | 2 | 3  | 5,80 |
| VITRO SKIN        | Stainless Steel | 1                                | 6  | 5,16                             | 2 | 6  | 5,09 |
| VITRO SKIN        | Stainless Steel | 1                                | 9  | 4,62                             | 2 | 9  | 4,32 |
| VITRO SKIN        | Stainless Steel | 1                                | 12 | 4,94                             | 2 | 12 | 3,56 |
| VITRO SKIN        | Stainless Steel | 1                                | 15 | 2,80                             | 2 | 15 | 3,42 |
| VITRO SKIN        | Stainless Steel | 1                                | 18 | 2,08                             | 2 | 18 | 3,07 |
| VITRO SKIN        | Stainless Steel | 1                                | 21 | NA                               | 2 | 21 | 2,49 |
| VITRO SKIN        | HDPE            | 1                                | 1  | 5,89                             | 2 | 1  | 5,72 |
| VITRO SKIN        | HDPE            | 1                                | 3  | 6,49                             | 2 | 3  | 5,42 |
| VITRO SKIN        | HDPE            | 1                                | 6  | 5,01                             | 2 | 6  | 4,78 |
| VITRO SKIN        | HDPE            | 1                                | 9  | 3,56                             | 2 | 9  | 4,18 |
| VITRO SKIN        | HDPE            | 1                                | 12 | 3,86                             | 2 | 12 | 3,78 |
| VITRO SKIN        | HDPE            | 1                                | 15 | 3,21                             | 2 | 15 | 3,38 |
| VITRO SKIN        | HDPE            | 1                                | 18 | 3,39                             | 2 | 18 | 2,35 |
| VITRO SKIN        | HDPE            | 1                                | 21 | 2,47                             | 2 | 21 | 2,06 |
| VITRO SKIN        | Laminate        | 1                                | 1  | 6,12                             | 2 | 1  | 6,00 |
| VITRO SKIN        | Laminate        | 1                                | 3  | 5,43                             | 2 | 3  | 5,43 |
| VITRO SKIN        | Laminate        | 1                                | 6  | 4,78                             | 2 | 6  | 4,18 |
| VITRO SKIN        | Laminate        | 1                                | 9  | 3,91                             | 2 | 9  | 3,53 |
| VITRO SKIN        | Laminate        | 1                                | 12 | 3,19                             | 2 | 12 | 3,23 |
| VITRO SKIN        | Laminate        | 1                                | 15 | 2,53                             | 2 | 15 | 2,45 |
| VITRO SKIN        | Laminate        | 1                                | 18 | 2,16                             | 2 | 18 | 2,53 |
| VITRO SKIN        | Laminate        | 1                                | 21 | 2,27                             | 2 | 21 | 1,43 |
| VITRO SKIN        | Textile         | 1                                | 1  | 6,34                             | 2 | 1  | 6,51 |
| VITRO SKIN        | Textile         | 1                                | 3  | 4,20                             | 2 | 3  | 3,76 |
| VITRO SKIN        | Textile         | 1                                | 6  | 3,68                             | 2 | 6  | 3,45 |
| VITRO SKIN        | Textile         | 1                                | 9  | 3,76                             | 2 | 9  | 3,45 |
| VITRO SKIN        | Textile         | 1                                | 12 | 3,71                             | 2 | 12 | 3,43 |
| VITRO SKIN        | Textile         | 1                                | 15 | 3,57                             | 2 | 15 | 3,28 |
| VITRO SKIN        | Textile         | 1                                | 18 | 3,50                             | 2 | 18 | 3,02 |
| VITRO SKIN        | Textile         | 1                                | 21 | 3,22                             | 2 | 21 | 2,75 |

|            |      |   |    |      |   |    |      |
|------------|------|---|----|------|---|----|------|
| VITRO SKIN | Tile | 1 | 1  | 6,17 | 2 | 1  | 6,25 |
| VITRO SKIN | Tile | 1 | 3  | 5,94 | 2 | 3  | 5,82 |
| VITRO SKIN | Tile | 1 | 6  | 4,92 | 2 | 6  | 4,82 |
| VITRO SKIN | Tile | 1 | 9  | 4,45 | 2 | 9  | 4,31 |
| VITRO SKIN | Tile | 1 | 12 | 4,09 | 2 | 12 | 3,76 |
| VITRO SKIN | Tile | 1 | 15 | 3,36 | 2 | 15 | 3,23 |
| VITRO SKIN | Tile | 1 | 18 | 3,02 | 2 | 18 | 2,86 |
| VITRO SKIN | Tile | 1 | 21 | 3,16 | 2 | 21 | 2,26 |

**Raw data for calculated transfer of E. coli**

|            |                 |   |    |       |   |    |      |
|------------|-----------------|---|----|-------|---|----|------|
| VITRO SKIN | Stainless steel | 1 | 1  | 7,28  | 2 | 1  | 7,40 |
|            |                 | 1 | 3  | 6,26  | 2 | 3  | 6,48 |
|            |                 | 1 | 6  | 3,95  | 2 | 6  | 5,12 |
|            |                 | 1 | 9  | ##### | 2 | 9  | 4,73 |
|            |                 | 1 | 12 | 2,48  | 2 | 12 | 3,88 |
|            |                 | 1 | 15 | 1,48  | 2 | 15 | 3,04 |
|            |                 | 1 | 18 | 1,26  | 2 | 18 | 3,23 |
|            |                 | 1 | 21 | 1,08  | 2 | 21 | 3,34 |

**Experimen Blotting nc log CFU/surface**

|   |    |      |
|---|----|------|
| 3 | 1  | 5,81 |
| 3 | 3  | 5,42 |
| 3 | 6  | 5,92 |
| 3 | 9  | 4,40 |
| 3 | 12 | 3,80 |
| 3 | 15 | 3,00 |
| 3 | 18 | 2,87 |
| 3 | 21 | 2,37 |
| 3 | 1  | 6,32 |
| 3 | 3  | 5,65 |
| 3 | 6  | 5,02 |
| 3 | 9  | 4,19 |
| 3 | 12 | 3,26 |
| 3 | 15 | 2,93 |
| 3 | 18 | 2,45 |
| 3 | 21 | 2,75 |
| 3 | 1  | 6,18 |
| 3 | 3  | 5,82 |
| 3 | 6  | 5,01 |
| 3 | 9  | 4,29 |
| 3 | 12 | 3,06 |
| 3 | 15 | 2,89 |
| 3 | 18 | 2,33 |
| 3 | 21 | 1,91 |
| 3 | 1  | 5,73 |
| 3 | 3  | 5,68 |
| 3 | 6  | 5,03 |
| 3 | 9  | 4,13 |
| 3 | 12 | 3,55 |
| 3 | 15 | 3,02 |
| 3 | 18 | 3,32 |
| 3 | 21 | 2,92 |
| 3 | 1  | 5,89 |
| 3 | 3  | 5,53 |
| 3 | 6  | 4,85 |
| 3 | 9  | 3,52 |
| 3 | 12 | 2,95 |
| 3 | 15 | 2,35 |
| 3 | 18 | 2,61 |
| 3 | 21 | 1,80 |
| 3 | 1  | 6,18 |
| 3 | 3  | 4,20 |
| 3 | 6  | 3,52 |
| 3 | 9  | 3,34 |
| 3 | 12 | 3,42 |
| 3 | 15 | 3,23 |
| 3 | 18 | 3,28 |
| 3 | 21 | 2,98 |

|   |    |      |
|---|----|------|
| 3 | 1  | 5,95 |
| 3 | 3  | 5,57 |
| 3 | 6  | 4,89 |
| 3 | 9  | 4,26 |
| 3 | 12 | 3,76 |
| 3 | 15 | 2,92 |
| 3 | 18 | 2,32 |
| 3 | 21 | 2,33 |

|   |    |      |
|---|----|------|
| 3 | 1  | 7,48 |
| 3 | 3  | 7,02 |
| 3 | 6  | 5,16 |
| 3 | 9  | 4,63 |
| 3 | 12 | 4,11 |
| 3 | 15 | 3,26 |
| 3 | 18 | 2,48 |
| 3 | 21 | 1,92 |
