# Supplementary material for: Transfer and Decontamination of S. aureus in Transmission Routes Regarding Hands and Contact Surfaces
Source: PubMed Central journal article supplement (PMC4900614; doi:10.1371/journal.pone.0156390), 2016-06-09
Supplement: pone.0156390.s002.pdf [file pone.0156390.s002.pdf]

| Cleaner      | Wipe  | Humidity | Before c            |                     |                  |
|--------------|-------|----------|---------------------|---------------------|------------------|
|              |       |          | Stainless steel+ BA | Stainless steel+Egg | Laminat+BA       |
| Allrengöring | Blue  | High     | 6,53; 6,59; 6,88    | 7,29; 7,26; 7,21    | 6,66; 6,55; 6,63 |
|              | Blue  | Low      | 6,53; 6,59; 6,88    | 7,29; 7,26; 7,21    | 6,66; 6,55; 6,63 |
|              | White | High     | 6,84; 6,88; 6,84    | 7,2; 7,3; 8,13      | 6,66; 6,55; 6,63 |
|              | White | Low      | 6,84; 6,88; 6,84    | 7,2; 7,3; 8,13      | 6,66; 6,55; 6,63 |
| Virkon       | Blue  | High     | 3,83; 4,0; 4,1      | 7,36; 7,07; 7,16    | 6,71; 6,43; 6,73 |
|              | Blue  | Low      | 3,83; 4,0; 4,1      | 7,36; 7,07; 7,16    | 6,71; 6,43; 6,73 |
|              | White | High     | 3,83; 4,0; 4,1      | 7,36; 7,07; 7,16    | 6,71; 6,43; 6,73 |
|              | White | Low      | 3,83; 4,0; 4,1      | 7,36; 7,07; 7,16    | 6,71; 6,43; 6,73 |
| Dags 70      | Blue  | High     | 5,71; 6,38; 5,8     | 7,13; 7,1; 7,08     | 6,8; 6,71; 6,48  |
|              | Blue  | Low      | 5,71; 6,38; 5,8     | 7,13; 7,1; 7,08     | 6,8; 6,71; 6,48  |
|              | White | High     | 5,71; 6,38; 5,8     | 7,13; 7,1; 7,08     | 6,8; 6,71; 6,48  |
|              | White | Low      | 5,71; 6,38; 5,8     | 7,13; 7,1; 7,08     | 6,8; 6,71; 6,48  |

| Cleaning         |                  |                  | Level S. aureus (log CF) |                     |
|------------------|------------------|------------------|--------------------------|---------------------|
| Laminate+Egg     | Tile+BA          | Tile+Egg         | Stainless steel+ BA      | Stainless steel+Egg |
| 7,24; 7,14; 7,29 | 6,80; 6,73; 6,86 | 7,26; 7,16; 7,18 | <0,48; <0,48; <0,48      | 1,38; 1,8; 1,38     |
| 7,24; 7,14; 7,29 | 6,80; 6,73; 6,86 | 7,26; 7,16; 7,18 | <0,48; 1,26; 2,94        | 2,38; 2,88; 3,71    |
| 7,24; 7,14; 7,29 | 6,80; 6,73; 6,86 | 7,26; 7,16; 7,18 | 1,78; 1,38; 1,82         | 1,59; <0,4; <0,48   |
| 7,24; 7,14; 7,29 | 6,80; 6,73; 6,86 | 7,26; 7,16; 7,18 | 3,59; 3,49; 3,62         | 1,67; 2,55; 1,89    |
| 7,18; 7,34, 7,11 | 6,65; 6,78; 6,65 | 6,08; 6,95, 6,10 | <0,48; 1,59; 1,59        | <0,48; 0,48; <0,48  |
| 7,18; 7,34, 7,11 | 6,65; 6,78; 6,65 | 6,08; 6,95, 6,10 | <0,48, 1,78; 1,32        | 4,59; 4,14; 6,84    |
| 7,18; 7,34, 7,11 | 6,65; 6,78; 6,62 | 6,8; 6,95; 7,1   | <0,48; <0,48; 0,79       | 0,78; 1,38; 1,08    |
| 7,18; 7,34, 7,11 | 6,65; 6,78; 6,62 | 6,8; 6,95; 7,1   | 0,48; <0,48; 1,98        | 2,05, 2,18; 3,07    |
| 7,03; 7,28; 7,12 | 5,59; 6,22; 6,5  | 7,08; 7,28; 7,18 | 0,78; 1,18; 0,48         | 4,03; 3,73; 5,73    |
| 7,03; 7,28; 7,12 | 5,59; 6,22; 6,5  | 7,08; 7,28; 7,18 | 3,84; 3,33; 2,37         | 6,66; 7,16; 6,53    |
| 7,03; 7,28; 7,12 | 5,59; 6,22; 6,5  | 7,08; 7,28; 7,18 | 1,48; 1,08; <0,48        | 4,49; 2,36; 2,06    |
| 7,03; 7,28; 7,12 | 5,59; 6,22; 6,5  | 7,08; 7,28; 7,18 | 3,68; 2,02; 2,03         | 6,13; 6,36; 6,69    |

U/surface)

**After cleaning**

| Laminat+BA        | Laminate+Egg     | Tile+BA          | Tile+Egg         |
|-------------------|------------------|------------------|------------------|
| 2,55; 2,73; 2,69  | 4,07; 3,9; 3,24  | 0,48; 0,48; 0,48 | 2,91; 0,48; 0,48 |
| 3,77; 2,36; 3,17  | 6,11; 5,38; 7,03 | 0,95; 0,48; 0,95 | 6,89; 2,8; 6,34  |
| 2,94; 3,11; 3,53  | 3,43; 4,8; 4,2   | 2,49; 0,48; 2,93 | 2,54; 1,82; 2,39 |
| 4,6; 4,6; 4,97    | 6,63; 6,86; 6,62 | 3,5; 3,3; 3,06   | 6,95; 4,17; 4,71 |
| 1,08; 1,59; 1,18  | 3,18; 3,91; 3,65 | 0,78; 1,8; 1,95  | 1,26; 2,22; 0,48 |
| 1,08; 0,48; 3,41  | 6,45; 4,18; 4,76 | 1,08; 1,92; 1,18 | 6,18; 2,63; 5,72 |
| 1,18; 2,95; 1,18  | 2,82; 1,68; 2,03 | 0,48; 1,08; 0,78 | 2,44; 0,95; 2,95 |
| 3,89; 3,25; 3,22  | 6,76; 6,97; 6,44 | 1,98; 5,04; 1,94 | 5,59; 4,83; 3,33 |
| 2,12; 1,91; 3,05  | 5,73; 4,85; 5,2  | 0,48; 3,94; 1,86 | 5,34; 4,67; 5,26 |
| 4,08; 3,8; 4,6    | 6,76; 6,61; 7,12 | 5,06; 3,62; 1,43 | 6,97; 7,18; 6,96 |
| <0,48; 2,83; 1,08 | 5,8; 5,39; 5,98  | 3,97; 2,33; 2,28 | 4,39; 1,08; 2,61 |
| 6,01; 5,32; 4,71  | 6,66; 6,38; 6,71 | 2,49; 3,56; 4,56 | 6,37; 5,84; 5,35 |
