# Supplementary material for: Transfer and Decontamination of S. aureus in Transmission Routes Regarding Hands and Contact Surfaces
Source: PubMed Central journal article supplement (PMC4900614; doi:10.1371/journal.pone.0156390), 2016-06-09
Supplement: pone.0156390.s004.pdf [file pone.0156390.s004.pdf]

Sample

| Sample | Soap         |               |                      | log prevalue |
|--------|--------------|---------------|----------------------|--------------|
|        | log prevalue | log postvalue | log reduktionsfaktor |              |
| 1      | 6,15         | 2,28          | 3,87                 | 6,58         |
| 2      | 5,71         | 1,87          | 3,84                 | 5,38         |
| 3      | 5,96         | 2,65          | 3,31                 | 6,72         |
| 4      | 5,49         | 2,43          | 3,06                 | 6,08         |
| 5      | 6,04         | 3,29          | 2,74                 | 5,94         |
| 6      | 6,10         | 2,80          | 3,31                 | 4,78         |
| 7      | 5,88         | 3,61          | 2,27                 | 5,99         |
| 8      | 4,40         | 2,76          | 1,64                 | 5,86         |
| 9      | 5,58         | 3,29          | 2,29                 | 5,96         |
| 10     | 6,03         | 2,63          | 3,40                 | 5,91         |
| 11     | 5,48         | 3,00          | 2,48                 | 5,53         |
| 12     | 5,28         | 2,83          | 2,45                 | 6,17         |
| Mean   | 5,71         | 2,78          | 2,93                 | 5,91         |
| sd     | 0,50         | 0,50          | 0,70                 | 0,52         |
| n      | 12           | 12            | 12                   | 12           |

| Time       | Wash with soap solution |      | Wash with soap solution and subsequent decir |      |
|------------|-------------------------|------|----------------------------------------------|------|
| Before was | 5,71                    | 0,50 | 5,91                                         | 0,52 |
| After wash | 2,78                    | 0,50 | 1,77                                         | 1,00 |

Soap + disinfection

| <u>log postvalue</u> | <u>log reduktionsfaktor</u> |
|----------------------|-----------------------------|
| 1,88                 | 4,70                        |
| 1,15                 | 4,23                        |
| 2,91                 | 3,81                        |
| 2,76                 | 3,31                        |
| 1,91                 | 4,03                        |
| 0,30                 | 4,48                        |
| 1,72                 | 4,28                        |
| 2,79                 | 3,07                        |
| 0,85                 | 5,12                        |
| 0,00                 | 5,91                        |
| 2,59                 | 2,94                        |
| 2,36                 | 3,81                        |
| 1,77                 | 4,14                        |
| 1,00                 | 0,86                        |
| 12                   | 12                          |

infection
