# Supplementary material for: Transfer and Decontamination of S. aureus in Transmission Routes Regarding Hands and Contact Surfaces
Source: PubMed Central journal article supplement (PMC4900614; doi:10.1371/journal.pone.0156390), 2016-06-09
Supplement: pone.0156390.s005.pdf [file pone.0156390.s005.pdf]

| Replicate | Prov                                       | S.aureus         | E.coli           |
|-----------|--------------------------------------------|------------------|------------------|
| 1         | Inoculated skin                            | 7,55; 7,58; 7,56 | 7,78; 7,90; 7,84 |
| 1         | Inoculated skin washed with water          | 7,23; 7,17; 7,20 | 6,38; 6,43; 6,41 |
| 1         | Inoculated skin washed with soap and water | 5,47; 5,73; 5,49 | 5,41; 5,68; 5,51 |
| 2         | Inoculated skin                            | 7,48; 7,52; 7,50 | 7,73; 7,62; 7,68 |
| 2         | Inoculated skin washed with water          | 6,84; 6,95; 6,89 | 6,18; 6,49; 6,33 |
| 2         | Inoculated skin washed with soap and water | 6,05; 5,61; 5,48 | 5,66; 5,45; 5,87 |
| 3         | Inoculated skin                            | 7,57; 7,67; 7,62 | 7,54; 7,77; 7,66 |
| 3         | Inoculated skin washed with water          | 6,96; 7,09; 7,02 | 5,40; 5,72; 5,56 |
| 3         | Inoculated skin washed with soap and water | 5,52; 5,67; 4,78 | 4,68; 4,49; 4,59 |
